1 **Shifts in antimalarial drug policy since 2006 have rapidly selected *P.***  
2 ***falciparum* resistance alleles in Angola**

3

4 Emily R Ebel<sup>1,2</sup>, Fátima Reis<sup>3</sup>, Dmitri A Petrov<sup>1</sup>, Sandra Beleza<sup>4\*</sup>

5

6 <sup>1</sup>Department of Biology, Stanford University, Stanford, CA 94305, United States of America

7 <sup>2</sup>Present address: Department of Pediatrics – Infectious Disease, Stanford University School of

8 Medicine, Stanford, CA 94305, United States of America

9 <sup>3</sup>Hospital Regional de Cabinda, C5QW+XP Cabinda, Angola

10 <sup>4</sup>Department of Genetics, University of Leicester, LE1 7RH, Leicester United Kingdom

11 \*sdsb1@leicester.ac.uk

12

13

14

15 **ABSTRACT**

16

17 **BACKGROUND:** *Plasmodium falciparum* resistance to chloroquine (CQ), the most  
18 widely used antimalarial drug, has historically posed a major threat to malaria control in  
19 Angola and throughout the world. Although Angola replaced CQ with artemisinin  
20 combination therapy (ACT) as a frontline treatment in 2006, malaria cases and deaths  
21 have recently been rising. CQ-resistance mutations may still be a contributing factor,  
22 given that (1) some also modulate resistance to ACT partner drugs and (2) ACT is not yet  
23 consistently implemented across Angola. It is important to continue monitoring all known  
24 resistance alleles in *P. falciparum*, but no studies have done so in Angola since 2012.

25

26 **METHODS:** We sampled *P. falciparum* DNA from the blood of 50 hospital patients in  
27 Cabinda, Angola in 2018. Each infection was genotyped for 13 alleles in the genes *crt*,  
28 *mdr1*, *dhps*, *dhfr*, and *kelch13*, which collectively confer resistance to six common drugs.  
29 To analyze frequency trajectories over time, we also collated *P. falciparum* genotype data  
30 published from across Angola in the last two decades.

31

32        **RESULTS:**    The two most important alleles for CQ resistance, *crt* 72-76CVIET and  
33        *mdr1* 86Y, have both declined in frequency from respective highs of 98% in 1999 and  
34        73% in 2003. However, the former remains at 71% frequency in this sample while the  
35        latter has dropped to just 7%. Of seven possible alleles for sulfadoxine-pyrimethamine  
36        (SP) resistance in *dhps* and *dhfr*, the average total number per isolate increased from 2.9  
37        in 2004 to 4.4 in 2018. Finally, we detected no non-synonymous polymorphisms in  
38        *kelch13*, which is involved in artemisinin resistance in Southeast Asia.

39  
40        **CONCLUSIONS:**    Changes in drug policy in Angola since 2006 appear to have  
41        exerted strong selection on *P. falciparum* drug resistance alleles. Resistance to CQ is  
42        declining, but due to functional tradeoffs and novel selection at *mdr1* loci, resistance to  
43        ACT partner drugs appears to be rising. More haplotype-based studies at *mdr1* will be  
44        needed to understand the changing efficacy of multiple drugs. Finally, SP resistance has  
45        jumped rapidly since 2014, consistent with widespread use of intermittent SP treatment  
46        during pregnancy. These data can be used to support effective drug policy decisions in  
47        Angola.

48  
49

## 50    **KEYWORDS**

51    *Plasmodium falciparum*, Angola, chloroquine, lumefantrine, drug resistance, selection

52  
53

## 54    **BACKGROUND**

55

56        Antimalarial drugs have long been important tools for malaria control<sup>1</sup>. However, their  
57        efficacy is constantly threatened by the evolution of drug resistance in *Plasmodium falciparum*<sup>2</sup>.  
58        Multiple *P. falciparum* genes are involved in drug resistance, and selection on them varies by  
59        allele, genetic background, and drug environment<sup>3-5</sup>. Therefore, frequent monitoring of resistance  
60        alleles is crucial to predicting the spread of drug resistance. This is especially true in the West  
61        African country of Angola, where malaria cases and deaths are on the rise<sup>6</sup>.

62 The first anti-malarial drug to enjoy widespread use in Angola was chloroquine (CQ) in  
63 the 1950s<sup>7</sup>. CQ resistance was first confirmed in Angola in the 1980s, and by the early 2000s,  
64 CQ failure rates exceeded 80%<sup>8,9</sup>. As a result, CQ was discontinued in Angola in favor of  
65 artemisinin-based combination therapy (ACT) starting in 2006<sup>10</sup>. To discourage the evolution of  
66 artemisinin resistance, artemisinin is used in combination with the longer-acting partner drugs  
67 lumefantrine (LMF) or amodiaquine (AQ), which is chemically related to CQ<sup>11</sup>. Artemisinin  
68 resistance has not yet appeared in Angola, although many resistant *kelch13* mutations have  
69 emerged in Southeast Asia<sup>5,12</sup>. Nonetheless, occasional ACT treatment failures have been  
70 reported in Angola due to partner drug resistance<sup>10</sup>.

71 Strong *P. falciparum* resistance to CQ and AQ is caused by *crt* K76T, a lysine to  
72 threonine substitution at codon 76 of the chloroquine resistance transporter (Table 1). A meta-  
73 analysis found this allele to be 7.2-fold overrepresented in CQ treatment failures<sup>13</sup>, reflecting its  
74 selection by CQ and AQ in many clinical studies (Table 1). In Angola, K76T is found on the  
75 haplotype *crt* 72-76 CVIET, which is of Asian origin<sup>14</sup>. CQ resistance has also evolved  
76 independently through the haplotype *crt* 72-76 SVMNT in South America and Papua New  
77 Guinea<sup>15</sup>.

78 The N86Y allele of *mdr1*, or multidrug resistance gene 1, also confers resistance to CQ  
79 and AQ<sup>13</sup>. Although this specific polymorphism dominated early studies of *mdr1* and CQ  
80 resistance, the evolution of *mdr1* is complicated by linkage between position 86 and other  
81 functional polymorphisms<sup>16</sup>. Precise *mdr1* haplotypes vary among *P. falciparum* populations and  
82 drug settings, but in Angola alone, at least six alleles at three *mdr1* positions have been proposed  
83 to modulate resistance to CQ, AQ, and the ACT partner drug lumefantrine (LMF) (Table 1;  
84 Table S1).

85 The drug sulfadoxine-pyrimethamine (SP) has also been in widespread use in many  
86 African countries since the 1960s<sup>17</sup>. *P. falciparum* quickly began evolving partial resistance to  
87 SP, mediated by numerous substitutions in *dhps* and *dhfr*<sup>18</sup>. The risk of SP treatment failure  
88 increases with the number of mutant alleles present, with “quintuple mutants” at codons 437/540  
89 of *dhps* and codons 51/59/108 of *dhfr* of particular concern<sup>19-21</sup>. By the early 2000s, these alleles  
90 were common in Angola and 25-39% of *P. falciparum* infections failed to respond to SP  
91 treatment<sup>9</sup>. SP has since been discontinued as a frontline therapy, but it is still administered to  
92 pregnant women to reduce common complications from malaria<sup>22</sup>. Although this approach is

| drug                                   | <i>crt</i> |    |    |    |    | <i>mdr1</i> |                |                |
|----------------------------------------|------------|----|----|----|----|-------------|----------------|----------------|
|                                        | 72         | 73 | 74 | 75 | 76 | 86          | 184            | 1246           |
| CQ,AQ<br>(chloroquine,<br>amodiaquine) |            |    |    |    |    | Y           | -              | -              |
|                                        | C          | V  | I  | E  | T  | -           | -              | Y              |
|                                        | S          | V  | M  | N  | T  | Y           | Y <sup>†</sup> | Y              |
|                                        |            |    |    |    |    | Y           | F*             | D <sup>†</sup> |
|                                        |            |    |    |    |    | -           | F*             | -              |
| LMF<br>(lumefantrine)                  |            |    |    |    |    | N           | -              | -              |
|                                        |            |    |    |    |    | -           | -              | D              |
|                                        |            |    |    |    |    | N           | -              | D              |
|                                        | C          | V  | M  | N  | K* | N           | F              | D              |
|                                        |            |    |    |    |    | N           | F              | -              |
|                                        |            |    |    |    |    | N           | Y <sup>†</sup> | D              |
|                                        |            |    |    |    |    | N           | Y <sup>†</sup> | -              |

93

94 **Table 1. Alleles of *P. falciparum* genes *crt* and *mdr1* that are preferred in the presence of frontline**  
95 **antimalarial drugs.** Although CQ has been discontinued in Angola, CQ-resistance loci are also involved  
96 in resistance to the ACT partner drugs AQ and LMF. Numbers in the header indicate amino acid position.  
97 For *mdr1*, incomplete haplotypes are shown as reported in the literature. \*These alleles are unlikely to  
98 confer resistance directly, but they are less deleterious than the alternate allele in the presence of drug.  
99 †This allele is unlikely to confer resistance directly, but it is linked to other functional alleles. Additional  
100 details and references are available in Table S1.

101

102

103 generally still useful in Africa<sup>23,24</sup>, its efficacy is waning as additional *dhps* mutations continue to  
104 emerge<sup>18,25-27</sup>. In one recent example from Tanzania, a novel mutation at *dhps* 581 was both  
105 selected by SP treatment and associated with worse pregnancy outcomes<sup>28</sup>. Because SP is still in  
106 widespread use, it is critical to continue monitoring its effectiveness along with variation in its  
107 target genes.

108 In this work, 50 *P. falciparum* infections from Cabinda, Angola were genotyped for 13  
109 markers of drug resistance in the genes *crt*, *mdr1*, *dhps*, *dhfr*, and *kelch13*. Similar allele  
110 frequency data were also gathered from studies published on Angolan *P. falciparum* in the last  
111 two decades. For every locus but *kelch13*, we found temporal patterns of allele frequency change  
112 that are consistent with changes in drug policy. This work can inform future decisions on drug  
113 administration in Angola, particularly given rapid increases in SP resistance.

114

115

## 116 **RESULTS**

117

### 118 Genotyping success and MOI

119 Each sample was successfully genotyped at an average of 12 out of 13 loci (Table S3).  
120 The *kelch13* locus had the highest success rate (100%), while *crt* had the lowest success rate  
121 (78%). Although the *crt* primers have performed well on other Angolan samples<sup>29</sup>, in this cohort,  
122 even the nested protocol amplified products of multiple sizes (Fig S1).

123 Fifteen of 50 samples had sequence diversity (i.e., peaks of two bases) in at least one  
124 resistance marker site. Assuming that double peaks indicated the presence of two strains, the  
125 overall multiplicity of infection (MOI) was 1.3.

126

### 127 Very little polymorphism in *kelch13*

128 No *kelch13* polymorphisms were observed at codons 578-580, which have been  
129 associated with ACT resistance in Southeast Asia and Uganda<sup>12</sup>. Moreover, with the exception of  
130 one synonymous variant in one sample, no polymorphism was observed across all 261 *kelch13*  
131 codons sequenced in this study.

132

### 133 Markers of CQ resistance and LMF susceptibility are declining

134 The CVIET haplotype at *crt* codons 72-76, which confers strong resistance to CQ, was  
135 detected at 71% frequency in this study (Fig 1). This represents a significant decline from a peak  
136 of 98% in 1999 ( $p = 0.03$ ), although individual estimates have been noisy over time.

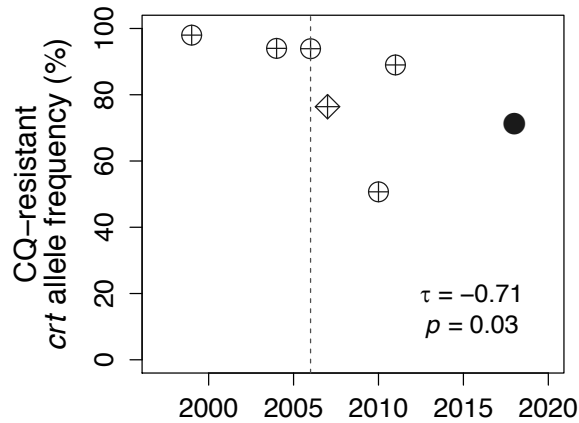

137

138 **Figure 1. The frequency of CQ (chloroquine)-resistant alleles in *crt* has declined in Angola since the**  
139 **late 1990s.** The solid circle indicates new data from this study. Historical data were obtained from <sup>29,31-35</sup>.  
140 The diamond indicates the combined presence of two resistant haplotypes (CVIET and SVMNK) at *crt*  
141 72-76 in <sup>29</sup>; all other points represent CVIET only.  $\tau$  is the Kendall rank correlation between time of  
142 sampling and frequency of resistance. The dashed line shows the year that CQ was officially discontinued  
143 in Angola.

144

145

146

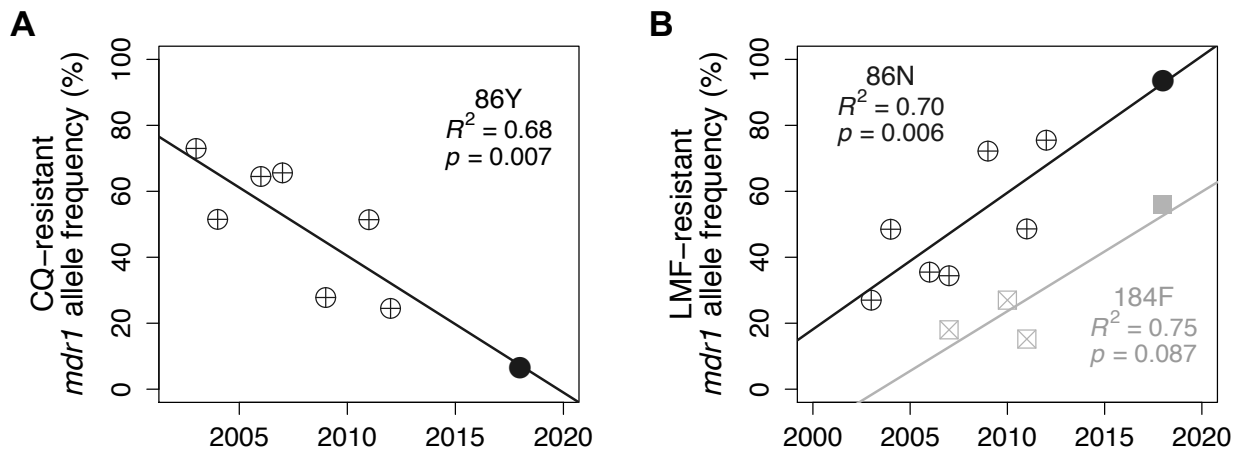

147

148 **Figure 2. *mdr1* allele frequencies have changed steadily in Angola since the early 2000s.** Solid points  
149 indicate new data from this study. Historical data were obtained from <sup>29,32-37</sup>. Lines of best fit, variance  
150 explained ( $R^2$ ), and  $p$ -values from linear regression are shown for each allele.

151

152

153 The *mdr1* allele 86Y, which also confers resistance to CQ, was detected at just 6.5%  
154 frequency in this study (Fig 2A). This marker has declined rapidly and steadily from ~80%  
155 frequency in 2003 ( $p = 0.007$ ). Accordingly, the alternate allele 86N—which is both CQ-  
156 sensitive and LMF-resistant (Table 1)—has increased in frequency to 93.5% (Fig 2B,  $p = 0.006$ ).  
157 The linked polymorphism *mdr1* 184F, which is also preferred in the presence of LMF (Table 1),  
158 has been rising in frequency at a similar rate (Fig 2B,  $p = 0.087$ ), although it remains less  
159 common than 86N. A single sample contained the additional CQ-resistance allele *mdr1* 1246Y  
160 (Table 1), which occurred on an 86Y/184Y background (Table S3).

161

### 162 Markers of SP resistance markers have become more common

163 One third (33%) of *P. falciparum* isolates sampled here were “quintuple mutants” for five  
164 *dhfr* and *dhps* alleles that confer strong SP resistance (Fig 3). Compared to samples from migrant  
165 workers collected around 2014<sup>38</sup>, this represents a 2.8X increase of quintuple mutants in Angola  
166 in less than five years. Three “sextuple mutants” were also observed for the first time in Angola,  
167 including resistance alleles at *dhps* codons 436 (22% frequency) and 581 (8.2% frequency). The  
168 average number of combined *dhfr/dhps* resistance alleles per isolate has increased sharply over  
169 time, from 2.9/7 in 2004 to 4.4/7 in this study ( $t = -9.71, p < 2.2 \times 10^{-16}$ ).

170

171

## 172 **DISCUSSION**

173

174 The official withdrawal of CQ in Angola since 2006 has likely contributed to the decline  
175 of CQ-resistance alleles in *crt* (Fig 1) and *mdr1* (Fig 2A). This result is similar to other African  
176 countries that have discontinued CQ, including Malawi, the Gambia, Kenya, Ethiopia, Tanzania,  
177 and Grand Comore<sup>39</sup>. In Malawi, clinical CQ sensitivity largely returned after the prevalence of  
178 *crt* K76T declined from 85% in 1992 to 13% in 2000<sup>40</sup>. In Angola, however, the prevalence of  
179 the CVIET haplotype in Angola remains high at 71% (Fig 1). Although the exact fraction of  
180 resistant parasites may vary by locality (Fig 1), these results imply that CQ resistance via *crt* is  
181 still standard in Angola. In contrast, the rate of decline of *mdr1* 86Y—the second-most important  
182 CQ-resistance allele—is sharp enough to suggest its disappearance from Angola within a few  
183 years (Fig 2A). This stark difference between the evolution of *crt* and *mdr1* may be best

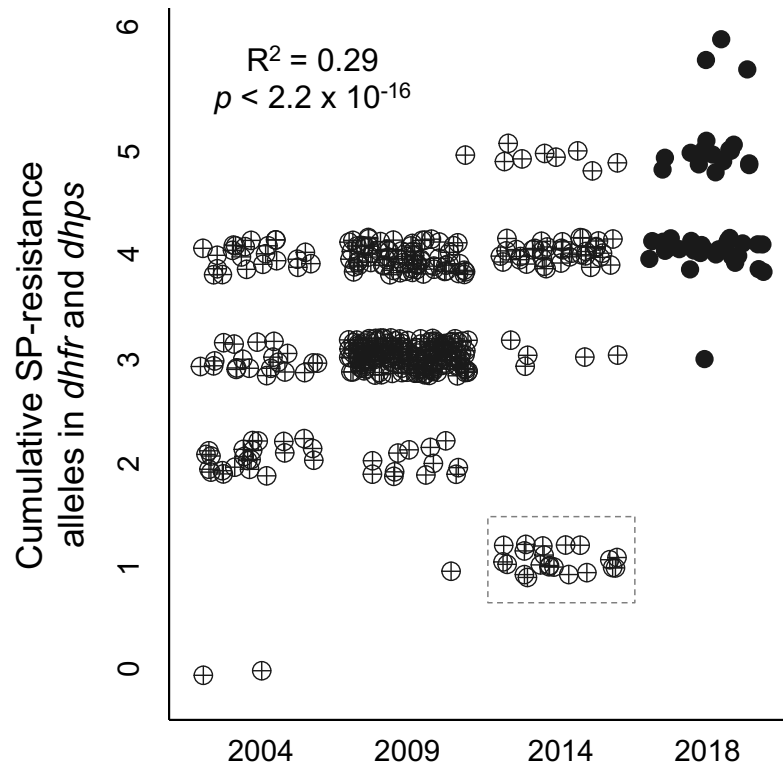

184

185 **Figure 3. SP-resistant alleles in *dhfr* and *dhps* have become more common in Angola since**  
 186 **the early 2000s.** Each point represents the total number of resistance alleles in both genes from a  
 187 single isolate. Solid points indicate new data from this study; historical data are from <sup>32,38,41</sup>.  
 188 Points are jittered horizontally and vertically for clarity. Resistance alleles were counted at *dhfr*  
 189 codons 51, 59, and 108 and *dhps* codons 436, 437, 540, and 581. The dashed box surrounds a  
 190 subset of 2014 isolates that carried 0-3 mutant alleles, but for which more precise data were not  
 191 available. Variance explained ( $R^2$ ) and  $p$ -value are shown are from a linear regression excluding  
 192 all 2014 data.

193

194

195 explained by the differential effects of LMF, an ACT partner drug, on their CQ-sensitive alleles  
 196 (Table 1). Specifically, wild-type *crt* K76 is only passively selected in the absence of CQ, while  
 197 wild type *mdr1* N86 directly confers LMF resistance (Table 1). LMF resistance is highest when  
 198 *mdr1* N86 co-occurs with *mdr1* 184F, which is rapidly spreading in Angola (Fig 2B), and *mdr1*  
 199 1246D, which is nearly fixed (Table S3). Consequently, the rise of LMF resistance could soon  
 200 challenge the success of ACT as currently implemented in Angola.

201 The most rapid change observed in this study was the increase in total SP-resistance alleles  
 202 per isolate (Fig 3). Similar increases over time have been reported in a number of other African



203 countries<sup>42-44</sup>, likely in response to the implementation of WHO recommendations for SP during  
204 pregnancy. It is now clear that more than five mutations in *dhfr/dhps* contribute to SP resistance:  
205 in our sample, seven such mutations were present, and three infections (7.0%) carried six of them.  
206 Because intermittent SP treatment currently recommended by the WHO does not eliminate  
207 parasitemia<sup>45</sup>, it is strongly expected to select for additional SP resistance. The benefits of SP in  
208 pregnancy have outweighed these costs in the past, but the present rate of resistance evolution  
209 implies that these benefits may be eroding<sup>27,28</sup>. Further research will be required to weigh the  
210 impact of novel resistance haplotypes against other factors impacting SP treatment efficacy. To  
211 help accomplish this goal, we emphasize the importance of reporting complete haplotype  
212 information for all combined *dhfr/dhps* alleles in each sampled infection.

213 Finally, we detected no signs of artemisinin-resistant alleles in *kelch13*. This result is  
214 consistent with the high efficacy of ACT in Angola<sup>10</sup>, and overall, there is little evidence that  
215 artemisinin resistance alleles are spreading in Africa<sup>46</sup>. Monitoring of *kelch13* in Africa is  
216 nonetheless important, as artemisinin is the only drug for which resistance alleles are not already  
217 widespread.

218  
219

## 220 **CONCLUSIONS**

221

222 Changes in drug policy since 2006 have had clear impacts on the frequencies of several  
223 drug resistance alleles in Angola. Markers of SP resistance are rapidly becoming more common,  
224 which endangers the efficacy of intermittent treatment during pregnancy. Resistance to CQ is  
225 declining, but resistance to LMF appears to be rising. More frequent monitoring and drug policy  
226 adjustments will likely be necessary to regain control of *P. falciparum* malaria in Angola.

227

228

## 229 **METHODS**

230

### 231 Sample collection and ethics statement

232 Patients reporting to the Hospital Regional de Cabinda in 2018/2019 with fever, chills, or  
233 other malaria symptoms were offered the option to be consented to this study. Sample collection

234 followed protocols approved by Stanford University (IRB #39149) and the Medical Ethics  
235 Committee of the University 11<sup>th</sup> of November in Cabinda. Consented participants' blood was  
236 drawn from a vein and screened under a microscope for *P. falciparum* parasites. If positive,  
237 whole blood was filtered through cellulose columns to remove leukocytes<sup>47</sup>. The filtered red  
238 blood cells were spotted on Whatman FTA cards (Sigma Aldrich), dried, and stored for at least 6  
239 months.

240

#### 241 DNA extraction and genotyping

242 To elute DNA, saturated circles were cut out of the Whatman FTA cards and incubated in  
243 800 uL TE buffer (10 mM Tris-Cl, 1 mM EDTA, pH 8.0) with 20 uL Proteinase K (Invitrogen)  
244 for 2 hours at 65°C. DNA was extracted from the liquid supernatant using a phenol-chloroform  
245 protocol with phase-lock gel tubes<sup>48</sup>.

246 PCR amplification of the *P. falciparum* genes *crt*, *mdr1*, *dhfr*, *dphs*, and *kelch13* was  
247 performed with previously published primers<sup>29,49,50</sup>. Cycling protocols were based on  
248 manufacturer recommendations for OneTaq Hot Start 2X Master Mix (NEB) and/or Phusion  
249 High-Fidelity PCR Master Mix with HF Buffer (NEB) (Table S2). Reactions were visualized in  
250 1% agarose gels, and if successful, cleaned with ExoSAP-IT (ThermoFisher) and Sanger  
251 sequenced (Elim Bio). Sanger chromatogram data were compared to PlasmoDB reference *P.*  
252 *falciparum* sequences using Benchling. Amino acid substitutions were identified in the following  
253 positions: *mdr1* 86, 184, and 1246; *crt* 72-76; *dhfr* 50, 51, 59, and 108; *dphs* 436, 437, 540, and  
254 681; and *kelch13* 578-580.

255

#### 256 MOI and allele frequency calculations

257 For each sample, a double infection was inferred if the sequencing chromatogram showed  
258 equally sized, double peaks for any of the 13 analyzed loci. Multiplicity of infection (MOI) was  
259 calculated as the total number of infections divided by the total number of samples, as previously  
260 described<sup>51</sup>. Similarly, the frequency of each allele was determined based on the total number of  
261 infections, with double infections at any locus contributing two genotypes at every locus.  
262 Samples without missing data at *dhfr* or *dphs* were also assessed for the presence of up to seven  
263 SP-resistance alleles (*dhfr*-51I, *dhfr*-59R, *dhfr*-108G, *dphs*-436, *dphs*-437G, *dphs*-540E, *dphs*-  
264 581)<sup>52,53</sup>.

265  
266  
267  
268  
269  
270  
271  
272  
273  
274  
275  
276  
277  
278  
279  
280  
281  
282  
283  
284  
285  
286  
287  
288  
289  
290  
291  
292  
293  
294  
295

Collection of historical data

Publications reporting allele frequencies for drug-resistance loci anywhere in Angola since 1995 were gathered from the Worldwide Antimalarial Resistance Network (WWARN) Molecular Surveyor tool (<http://www.wwarn.org/molecularsurveyor/>), facilitated by a recent review<sup>7</sup>. The original data published in these studies were used to calculate allele frequencies as described above. For studies that spanned multiple years, the average year was used for time-course analysis (below). Studies that did not provide linked data for *dhfr* and *dhps* (e.g., reported the two genes separately) could not be included.

Statistical analysis

To evaluate changes in *mdr1* and *dhfr/dhps* alleles over time, linear models were fit to the frequency or count data using the `lm` function in R. To avoid a bias from incomplete data, all 2014 samples were excluded from the *dhfr/dhps* timecourse analysis. For *crt*, the relationship between CVIET frequency and time was not linear; therefore, Kendall's rank correlation was applied using the `cor.test` function in R.

**DECLARATIONS**

Ethics approval and consent to participate

Ethics approval for this study was obtained from Stanford University IRB (#39149) and the Medical Ethics Committee of the University 11<sup>th</sup> of November in Cabinda.

Consent for publication

Prior to participation, all study subjects and/or their parents consented in writing to the publication of study results in the scientific literature.

Competing interests

The authors declare that they have no competing interests.

296 Funding

297 This study was supported with grants from the Stanford Center for Computational, Evolutionary,  
298 and Human Genomics to S.B. and E.R.E.; an MRC award (MR/M01987X/1) to S.B.; and an NIH  
299 award (5R35GM118165-05) to D.A.P.

300

301 Author's Contributions

302 E.R.E., D.A.P., and S.B. designed the study. F.R. and S.B. supervised the study. E.R.E. collected  
303 data, analyzed data, and wrote the manuscript. All authors have approved the final manuscript.

304

305 Acknowledgements

306 We are immensely grateful to the study participants and staff of the Hospital Regional de  
307 Cabinda. Logistic support in sample collection was provided by Dr. Maria das Dores Sungo and  
308 Dr. Francisco Casimiro Lubalo, Rector and Vice-Rector of the Faculty of Medicine,  
309 University 11th of November, Cabinda. We also thank Rachael Madison, Bàrbara Baro Sastre,  
310 and Elizabeth Egan for their assistance in preparing and testing sampling materials.

311

312

313 **REFERENCES**

314

- 315 1. Butler, A., Khan, S. & Ferguson, E. A brief history of malaria chemotherapy. *J. R. Coll.*  
316 *Physicians Edinb.* **40**, 172–177 (2010).
- 317 2. Haldar, K., Bhattacharjee, S. & Safeukui, I. Drug resistance in Plasmodium. *Nature*  
318 *Reviews Microbiology* vol. 16 156–170 (2018).
- 319 3. Gabryszewski, S. J., Modchang, C., Musset, L., Chookajorn, T. & Fidock, D. A.  
320 Combinatorial Genetic Modeling of pfert-Mediated Drug Resistance Evolution in  
321 Plasmodium falciparum. *Mol. Biol. Evol.* **33**, 1554–1570 (2016).
- 322 4. Veiga, M. I. *et al.* Globally prevalent PfMDR1 mutations modulate Plasmodium  
323 falciparum susceptibility to artemisinin-based combination therapies. *Nat. Commun.* **7**, 1–  
324 12 (2016).
- 325 5. Woodrow CJ & White NJ. The clinical impact of artemisinin resistance in Southeast Asia  
326 and the potential for future spread. *FEMS Microbiol. Rev.* **41**, 34–48 (2017).

- 327 6. USAID. *FY 2019 Angola Malaria Operational Plan*. [https://www.pmi.gov/docs/default-](https://www.pmi.gov/docs/default-source/default-document-library/malaria-operational-plans/fy19/fy-2019-angola-malaria-operational-plan.pdf)  
328 [source/default-document-library/malaria-operational-plans/fy19/fy-2019-angola-malaria-](https://www.pmi.gov/docs/default-source/default-document-library/malaria-operational-plans/fy19/fy-2019-angola-malaria-operational-plan.pdf)  
329 [operational-plan.pdf](https://www.pmi.gov/docs/default-source/default-document-library/malaria-operational-plans/fy19/fy-2019-angola-malaria-operational-plan.pdf) (2019).
- 330 7. Fançonny, C., Brito, M. & Gil, J. P. Plasmodium falciparum drug resistance in Angola.  
331 *Malaria Journal* vol. 15 74 (2016).
- 332 8. Vestergaard Olsen, V., Jensen, T. & J o rgensen, M. CHLOROQUINE-RESISTANT  
333 PLASMODIUM FALCIPARUM MALARIA FROM ANGOLA. *The Lancet* vol. 323  
334 1462–1463 (1984).
- 335 9. Guthmann, J. P. *et al.* Antimalarial efficacy of chloroquine, amodiaquine, sulfadoxine-  
336 pyrimethamine, and the combinations of amodiaquine + artesunate and sulfadoxine-  
337 pyrimethamine + artesunate in Huambo and Bié provinces, central Angola. *Trans. R. Soc.*  
338 *Trop. Med. Hyg.* **99**, 485–492 (2005).
- 339 10. WHO. *Angola African Region*. [https://www.who.int/malaria/publications/country-](https://www.who.int/malaria/publications/country-profiles/profile_ago_en.pdf)  
340 [profiles/profile\\_ago\\_en.pdf](https://www.who.int/malaria/publications/country-profiles/profile_ago_en.pdf) (2018).
- 341 11. Marquez, V. E., Cranston, J. W., Ruddon, R. W., Kier, L. B. & Burckhalter, J. H.  
342 Mechanism of Action of Amodiaquine. Synthesis of its Indoloquinoline Analog. *J. Med.*  
343 *Chem.* **15**, 36–39 (1972).
- 344 12. Fairhurst, R. M. Understanding artemisinin-resistant malaria: What a difference a year  
345 makes. *Current Opinion in Infectious Diseases* vol. 28 417–425 (2015).
- 346 13. Picot, S. *et al.* A systematic review and meta-analysis of evidence for correlation between  
347 molecular markers of parasite resistance and treatment outcome in falciparum malaria.  
348 *Malar. J.* **8**, 89 (2009).
- 349 14. Ariey, F. *et al.* Invasion of Africa by a single pfcrt allele of South East Asian type. *Malar.*  
350 *J.* **5**, 34 (2006).
- 351 15. Wootton, J. C. *et al.* Genetic diversity and chloroquine selective sweeps in Plasmodium  
352 falciparum. *Nature* **418**, 320–323 (2002).
- 353 16. Sanchez, C. P., Mayer, S., Nurhasanah, A., Stein, W. D. & Lanzer, M. Genetic linkage  
354 analyses redefine the roles of PfCRT and PfMDR1 in drug accumulation and  
355 susceptibility in Plasmodium falciparum. *Mol. Microbiol.* **82**, 865–878 (2011).
- 356 17. Flegg, J. A. *et al.* Trends in antimalarial drug use in Africa. *Am. J. Trop. Med. Hyg.* **89**,  
357 857–865 (2013).

- 358 18. Sibley, C. H. *et al.* Pyrimethamine-sulfadoxine resistance in *Plasmodium falciparum*:  
359 What next? *Trends in Parasitology* vol. 17 582–588 (2001).
- 360 19. Staedke, S. G. *et al.* Relationship between age, molecular markers, and response to  
361 sulphadoxine-pyrimethamine treatment in Kampala, Uganda. *Trop. Med. Int. Heal.* **9**,  
362 624–629 (2004).
- 363 20. Zhao, L. *et al.* Widespread resistance mutations to sulfadoxine-pyrimethamine in malaria  
364 parasites imported to China from Central and Western Africa. *Int. J. Parasitol. Drugs*  
365 *Drug Resist.* **12**, 1–6 (2020).
- 366 21. Nzila, A. M. *et al.* Towards an understanding of the mechanism of pyrimethamine-  
367 sulfadoxine resistance in *Plasmodium falciparum*: Genotyping of dihydrofolate reductase  
368 and dihydropteroate synthase of Kenyan parasites. *Antimicrob. Agents Chemother.* **44**,  
369 991–996 (2000).
- 370 22. WHO. *New WHO recommendations for IPTp-SP*.  
371 [http://whqlibdoc.who.int/publications/2010/9789241599412\\_eng.pdf](http://whqlibdoc.who.int/publications/2010/9789241599412_eng.pdf) (2014).
- 372 23. Ter Kuile, F. O., Van Eijk, A. M. & Filler, S. J. Effect of sulfadoxine-pyrimethamine  
373 resistance on the efficacy of intermittent preventive therapy for malaria control during  
374 pregnancy: A systematic review. *Journal of the American Medical Association* vol. 297  
375 2603–2616 (2007).
- 376 24. Taylor, S. M. *et al.* Antenatal Receipt of Sulfadoxine-Pyrimethamine Does Not  
377 Exacerbate Pregnancy-Associated Malaria Despite the Expansion of Drug-Resistant  
378 *Plasmodium falciparum*: Clinical Outcomes From the QuEERPAM Study. **55**, 42–50  
379 (2012).
- 380 25. Spalding, M. D. *et al.* Increased prevalence of the pfdhfr/phdhps quintuple mutant and  
381 rapid emergence of pfdhps resistance mutations at codons 581 and 613 in Kisumu, Kenya.  
382 *Malar. J.* **9**, 1–10 (2010).
- 383 26. Menéndez, C. *et al.* A Randomized Placebo-Controlled Trial of Intermittent Preventive  
384 Treatment in Pregnant Women in the Context of Insecticide Treated Nets Delivered  
385 through the Antenatal Clinic. *PLoS One* **3**, e1934 (2008).
- 386 27. Gesase, S. *et al.* High resistance of *Plasmodium falciparum* to  
387 sulphadoxine/pyrimethamine in Northern Tanzania and the emergence of dhps resistance  
388 mutation at codon 581. *PLoS One* **4**, (2009).

- 389 28. Harrington, W. E. *et al.* Competitive facilitation of drug-resistant *Plasmodium falciparum*  
390 malaria parasites in pregnant women who receive preventive treatment. *Proc. Natl. Acad.*  
391 *Sci. U. S. A.* **106**, 9027–9032 (2009).
- 392 29. Gama, B. E. *et al.* *Plasmodium falciparum* isolates from Angola show the StctVMNT  
393 haplotype in the *pfert* gene. *Malar. J.* **9**, 174 (2010).
- 394 30. Gama, B. E. *et al.* Chloroquine and sulphadoxine-pyrimethamine sensitivity of  
395 *Plasmodium falciparum* parasites in a Brazilian endemic area. *Malar. J.* **8**, 156 (2009).
- 396 31. Kryger Tomasz *et al.* Assessment of clinical course and outcome of *Plasmodium*  
397 *falciparum* malaria in Angola diagnosed by microscopic and molecular methods. *Int Marit*  
398 *Heal.* **55**, 75–85 (2004).
- 399 32. Menegon, M. *et al.* Monitoring for multidrug-resistant *Plasmodium falciparum* isolates  
400 and analysis of pyrimethamine resistance evolution in Uige province, Angola. *Trop. Med.*  
401 *Int. Heal.* **14**, 1251–1257 (2009).
- 402 33. Figueiredo, P. *et al.* Prevalence of *pfmdr1*, *pfert*, *pfdhfr* and *pfdhps* mutations associated  
403 with drug resistance, in Luanda, Angola. *Malar. J.* **7**, (2008).
- 404 34. Fançonny, C. *et al.* Various *pfert* and *pfmdr1* genotypes of *Plasmodium falciparum*  
405 cocirculate with *P. malariae*, *P. ovale* spp., and *P. vivax* in Northern Angola. *Antimicrob.*  
406 *Agents Chemother.* **56**, 5271–5277 (2012).
- 407 35. Foumane Ngane, V. *et al.* Molecular epidemiology of drug-resistant *Plasmodium*  
408 *falciparum* in Benguela province, Angola. *Malar. J.* **14**, (2015).
- 409 36. Pinheiro L *et al.* Presence of the double *pfmdr1* mutation 86Tyr and 1246 Tyr in clones of  
410 a chloroquine-resistant west African isolate of *Plasmodium falciparum*. *Acta Med Port* **16**,  
411 229–233 (2003).
- 412 37. Kiaco, K., Teixeira, J., Machado, M., do Rosário, V. & Lopes, D. Evaluation of  
413 artemether-lumefantrine efficacy in the treatment of uncomplicated malaria and its  
414 association with *pfmdr1*, *pfatpase6* and K13-propeller polymorphisms in Luanda, Angola.  
415 *Malar. J.* **14**, 504 (2015).
- 416 38. Xu, C. *et al.* Mutation Profile of *pfdhfr* and *pfdhps* in *Plasmodium falciparum* among  
417 Returned Chinese Migrant Workers from Africa. *Antimicrob. Agents Chemother.* **63**,  
418 (2019).
- 419 39. Huang, B. *et al.* Prevalence of CRT and *mdr-1* mutations in *Plasmodium falciparum*

- 420 isolates from Grande Comore island after withdrawal of chloroquine. *Malar. J.* **15**, 1–9  
421 (2016).
- 422 40. Kublin, J. G. *et al.* Reemergence of Chloroquine-Sensitive Plasmodium falciparum  
423 Malaria after Cessation of Chloroquine Use in Malawi . *J. Infect. Dis.* **187**, 1870–1875  
424 (2003).
- 425 41. Fortes, F. *et al.* Evaluation of prevalence's of pfdhfr and pfdhps mutations in Angola.  
426 *Malar. J.* **10**, 22 (2011).
- 427 42. Okell, L. C. *et al.* Emerging implications of policies on malaria treatment: Genetic  
428 changes in the Pfmdr-1 gene affecting susceptibility to artemether–lumefantrine and  
429 artesunate–amodiaquine in Africa. *BMJ Glob. Heal.* **3**, 999 (2018).
- 430 43. Hemming-Schroeder, E. *et al.* Impacts of antimalarial drugs on plasmodium falciparum  
431 drug resistance markers, Western Kenya, 2003-2015. *Am. J. Trop. Med. Hyg.* **98**, 692–699  
432 (2018).
- 433 44. Deutsch-Feldman, M. *et al.* The changing landscape of Plasmodium falciparum drug  
434 resistance in the Democratic Republic of Congo. *BMC Infect. Dis.* **19**, 1–10 (2019).
- 435 45. Aziken, M. E., Akubuo, K. K. & Gharoro, E. P. Efficacy of intermittent preventive  
436 treatment with sulfadoxine- pyrimethamine on placental parasitemia in pregnant women in  
437 midwestern Nigeria. in *International Journal of Gynecology and Obstetrics* vol. 112 30–  
438 33 (John Wiley and Sons Ltd, 2011).
- 439 46. WHO. *Malaria eradication: benefits, future scenarios and feasibility. Executive summary,*  
440 *WHO Strategic Advisory Group on Malaria Eradication.*  
441 <https://www.who.int/publications/i/item/who-cds-gmp-2019-10> (2019).
- 442 47. Venkatesan, M. *et al.* Using CF11 cellulose columns to inexpensively and effectively  
443 remove human DNA from Plasmodium falciparum-infected whole blood samples. *Malar.*  
444 *J.* **11**, 41 (2012).
- 445 48. Mukhopadhyay, T. & Roth1, J. A. *Silicone lubricant enhances recovery of nucleic acids*  
446 *after phenol-chloroform extraction. Nucleic Acids Research* vol. 21 (1993).
- 447 49. Talundzic, E. *et al.* Genetic analysis and species specific amplification of the artemisinin  
448 resistance-associated kelch propeller domain in P. falciparum and P. vivax. *PLoS One* **10**,  
449 (2015).
- 450 50. Gama, B. E. *et al.* Molecular markers of antifolate resistance in Plasmodium falciparum



- 451 isolates from Luanda, Angola. *Malar. J.* **10**, 248 (2011).
- 452 51. Saha, P., Ganguly, S. & Maji, A. K. Genetic diversity and multiplicity of infection of  
453 *Plasmodium falciparum* isolates from Kolkata, West Bengal, India. *Infect. Genet. Evol.*  
454 **43**, 239–244 (2016).
- 455 52. Wernsdorfer, W. H. & Noedl, H. Molecular markers for drug resistance in malaria: use in  
456 treatment, diagnosis and epidemiology. *Current opinion in infectious diseases* vol. 16  
457 553–558 (2003).
- 458 53. Gregson, A. & Plowe, C. V. Mechanisms of resistance of malaria parasites to antifolates.  
459 *Pharmacological Reviews* vol. 57 117–145 (2005).
- 460
